# Supplementary material
Source: PubMed Central journal article supplement (PMC7383367)
Supplement: supp_RA120.013654_159803_1_supp_529434_qc9prg.pdf [file supp_RA120.013654_159803_1_supp_529434_qc9prg.pdf]

## Supporting Information

### Structural basis for the binding of SNAREs to the multisubunit tethering complex Dsl1

Sophie M. Travis, Kevin DAMico, I-Mei Yu, Safraz Hamid, Gabriel Ramirez-Arellano, Philip D. Jeffrey, and Frederick M. Hughson

### Contents

- Figure S1.** Comparative analysis of *E. gossypii* Tip20 and Sec20 structures.
- Figure S2.** Properties of the *E. gossypii* Tip20•Sec20 complex.
- Figure S3.** *S. cerevisiae* Tip20 mutants minimally affect binding as judged by size exclusion chromatography.
- Figure S4.** Structure-based mutations destabilize the *S. cerevisiae* Tip20•Sec20<sub>1-174</sub> complex.
- Figure S5.** *S. cerevisiae* Tip20 interface mutants are viable.
- Figure S6.** Additional N-terminal regions modeled for *K. lactis* Sec39.
- Figure S7.** Electron density for *K. lactis* Use1 is consistent with an Habc domain topology.
- Figure S8.** Secondary structure prediction suggests that the N-terminal domain of Use1 is  $\alpha$ -helical.
- Table S1.** Summary of crystallographic parameters.
- Table S2.** Isothermal titration calorimetry fit parameters of *S. cerevisiae* Tip20 mutants.
- Table S3.** Alternative Use1 Habc domain molecular replacement solutions.

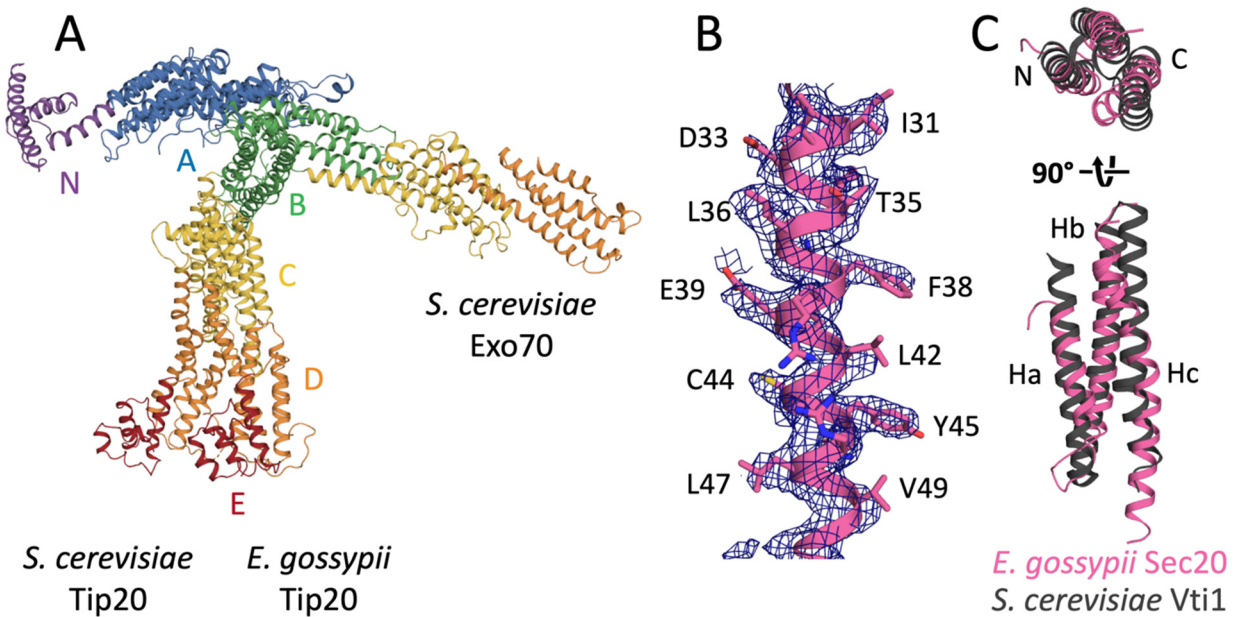

**Figure S1. Comparative analysis of *E. gossypii* Tip20 and Sec20 structures.** *A*, *E. gossypii* and *S. cerevisiae* Tip20 (3FHN, chain A) superimpose with an RMSD of 2.9 Å over 394 residues. The major difference between the two structures is the different relative orientation of domains B and C. *S. cerevisiae* Exo70 (2PFV) adopts a much more linear configuration. The three proteins are shown aligned on domain A. *B*, Representative electron density for *E. gossypii* Sec20 (pink), showing side chain assignments. The composite omit 2Fo-Fc map (dark blue mesh) is contoured at 1 $\sigma$ . *C*, *E. gossypii* Sec20<sub>NTD</sub> (pink) resembles *S. cerevisiae* Vti1 (3ONJ, gray), superimposing with an RMSD of 2.3 Å over 78 residues of the structure.

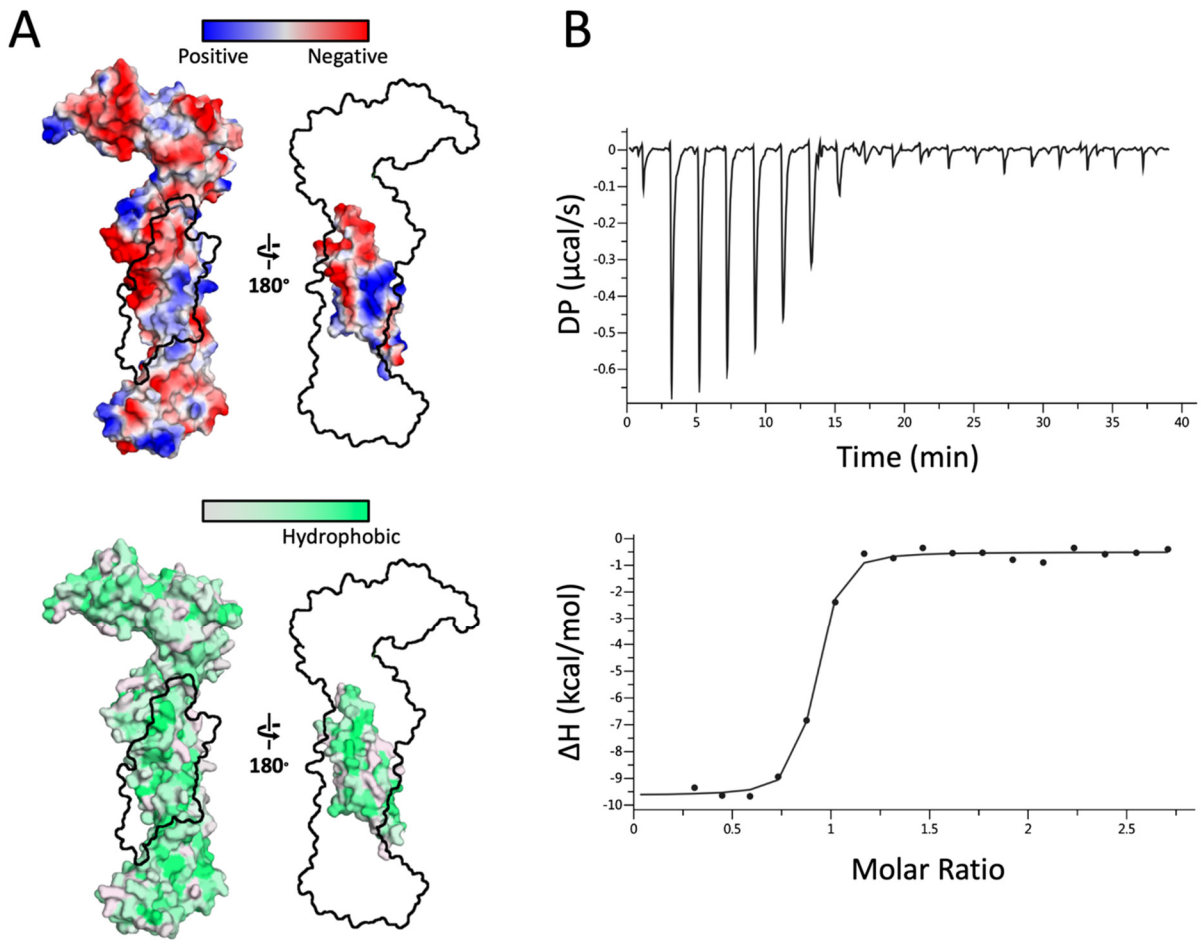

**Figure S2. Properties of the *E. gossypii* Tip20•Sec20 complex.** *A*, The protein:protein interface lacks obvious distinguishing features in terms of surface electrostatic potential (top) or hydrophobicity (bottom). *B*, Isothermal titration calorimetry data for MBP-Sec20<sub>1-136</sub> and Tip20; see Table S2.

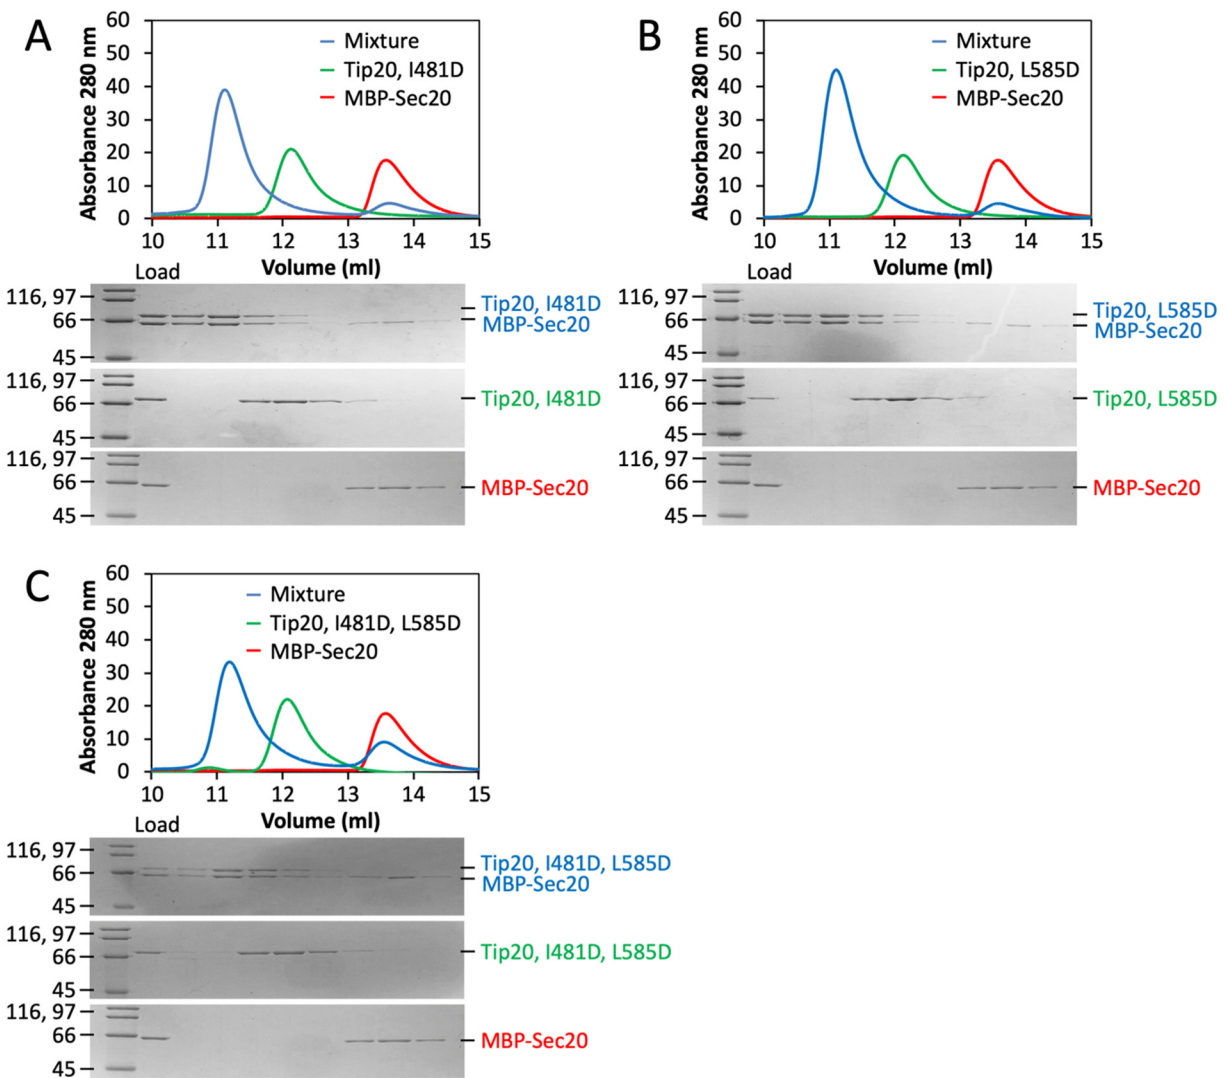

**Figure S3. *S. cerevisiae* Tip20 mutants minimally affect binding as judged by size exclusion chromatography.** *A-C*, Replacing *S. cerevisiae* Tip20 Ile-481, Leu-585, or both with aspartate had little effect on complex formation. The data presented for MBP-Sec20 alone in (*A-C*) are identical to that in Figure 3*A*.

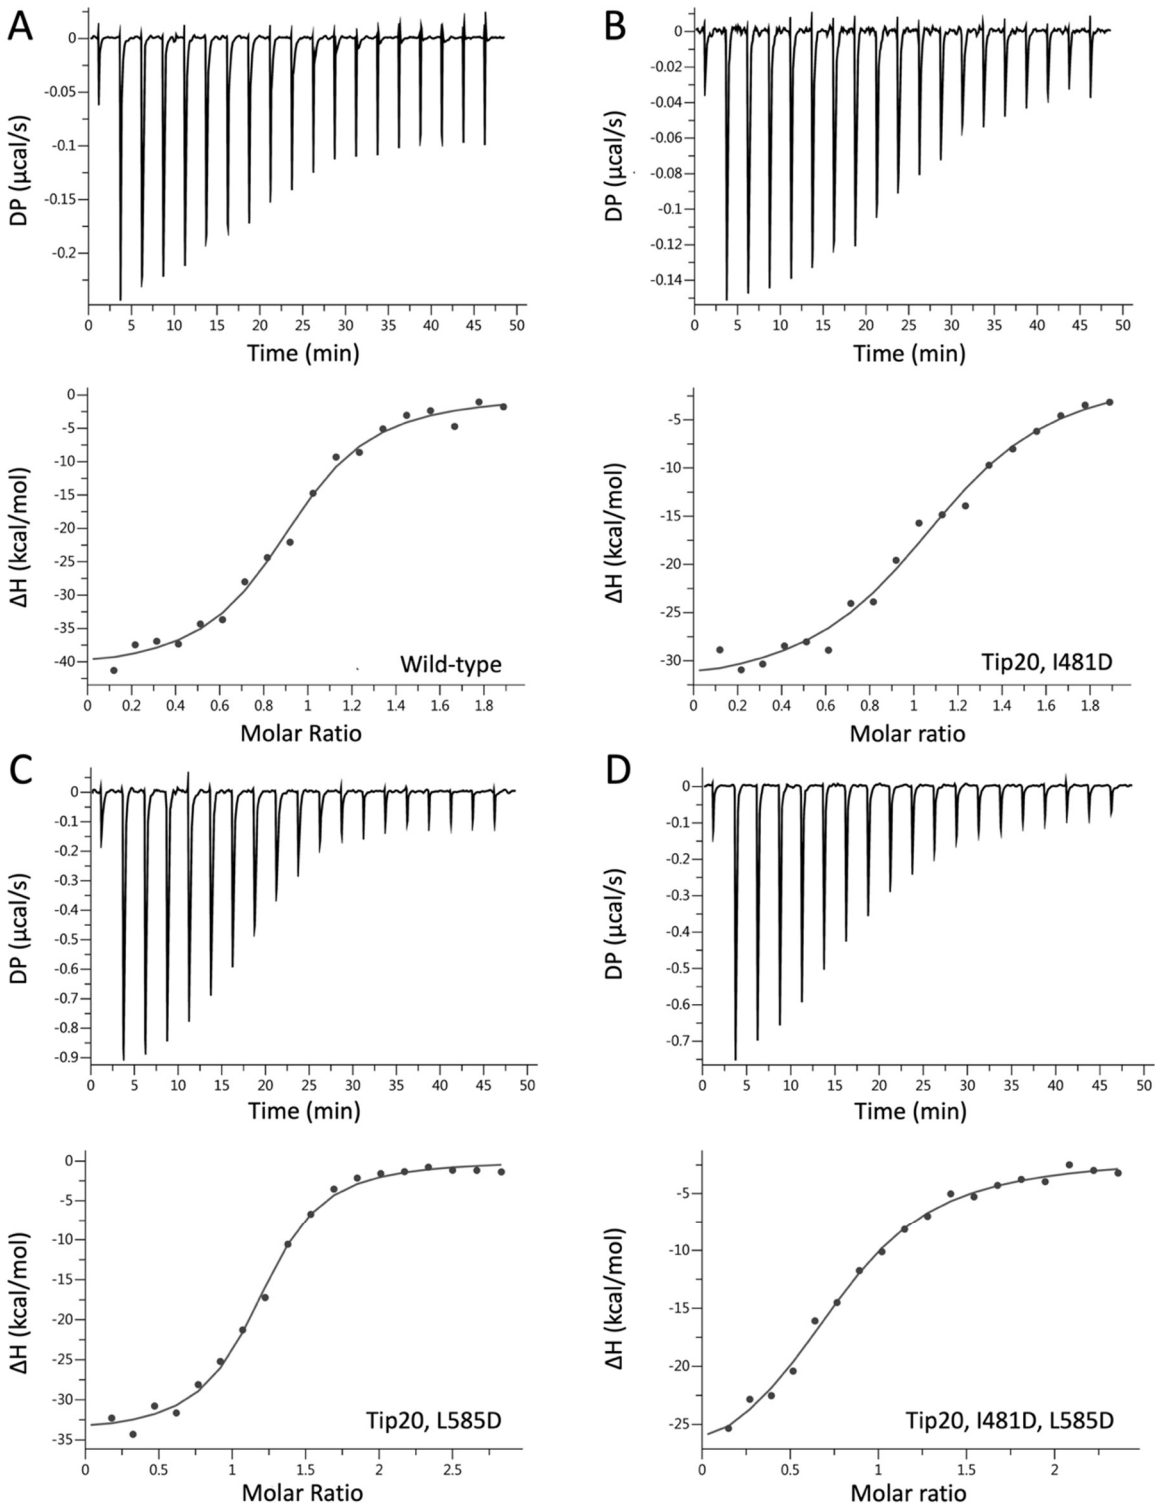

**Figure S4. Structure-based mutations destabilize the *S. cerevisiae* Tip20•Sec20<sub>1-174</sub> complex.** A-D, Isothermal titration calorimetry data for Sec20<sub>1-174</sub> and the indicated Tip20 mutants; see Table S2.

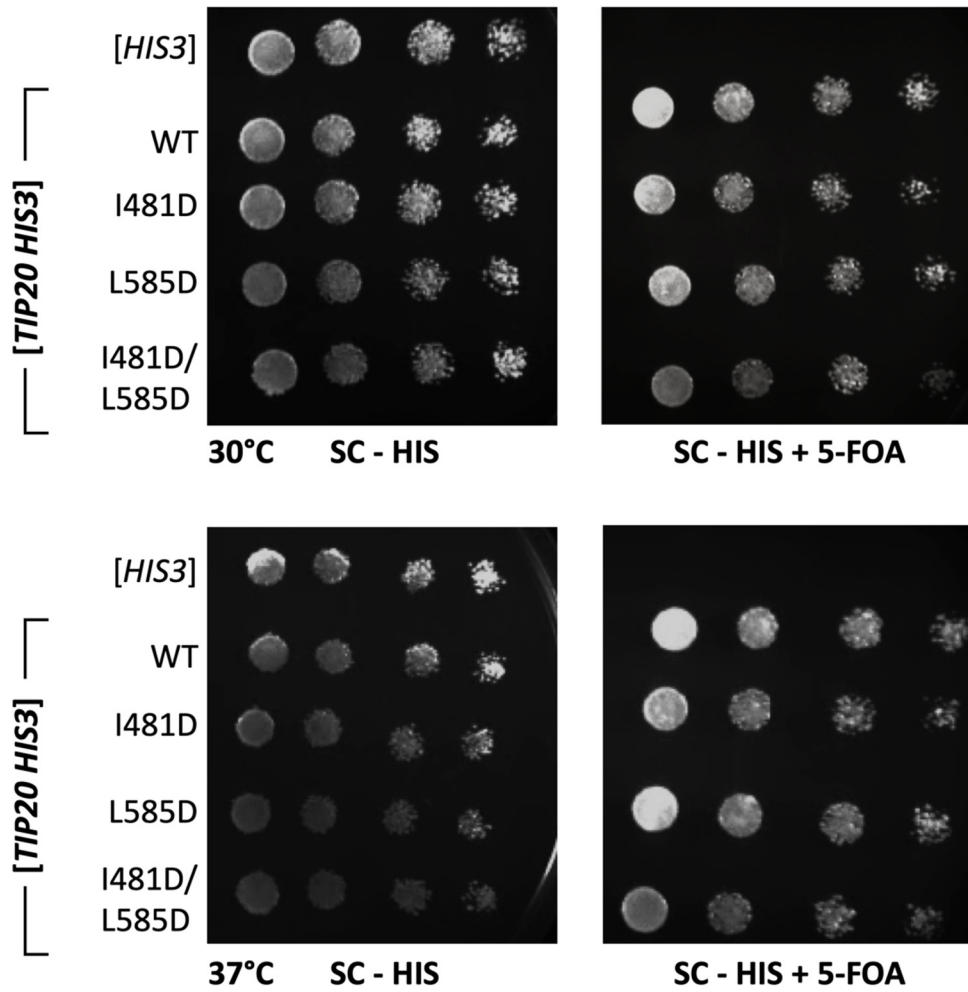

**Figure S5. *S. cerevisiae* Tip20 interface mutants are viable.** As in Figure 4, mutant alleles of *S. cerevisiae* Tip20, linked to His3, were tested for viability upon counterselection against a wild-type copy of Tip20, linked to Ura3. Although an empty His3 plasmid was not able to support viability, all alleles of Tip20 tested were viable, even at elevated temperature.

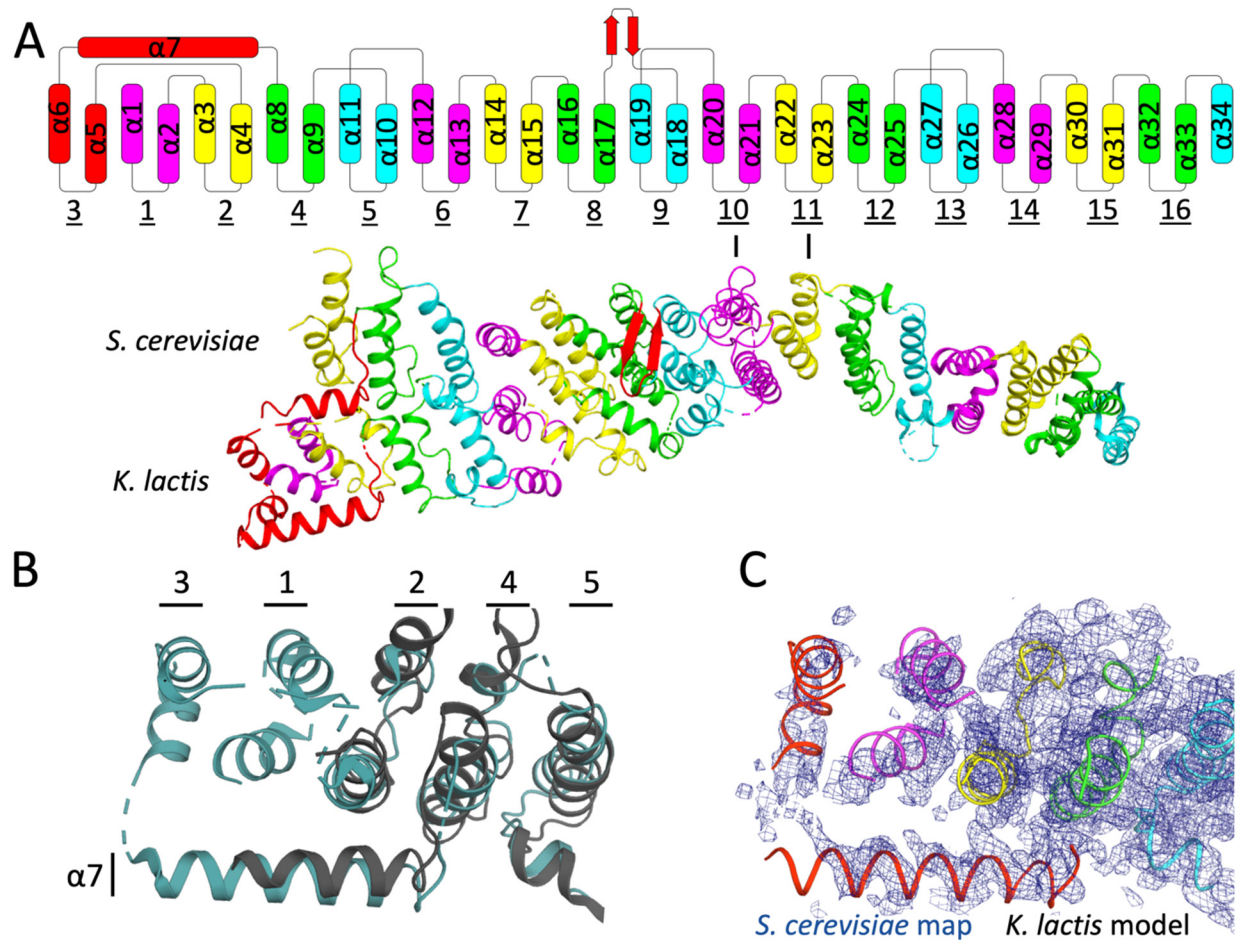

**Figure S6. Additional N-terminal regions modeled for *K. lactis* Sec39.** *A*, Above, topology of Sec39, with color-coding to illustrate the correspondence between individual  $\alpha$ -helices and hairpins. Below, *S. cerevisiae* and *K. lactis* Sec39 superimpose with an RMSD of 3.7 Å over 436 residues. Superimposition at the C-terminus shows that the two structures differ primarily due to bending between layers 10 and 11 (indicated). *B*, Four additional helices were modeled at the N-terminus of *K. lactis* Sec39 (cyan), representing hairpins 1 and 3. In addition, the N-terminus of  $\alpha 7$  was extended relative to *S. cerevisiae* Sec39 (3K8P, gray). The two structures are superimposed at the N-terminus. *C*, Contoured at 1  $\sigma$ , the *S. cerevisiae* 2Fo-Fc map (3K8P, blue mesh) contains weak density, not previously interpreted, corresponding to hairpins 1 and 3 as modeled in the *K. lactis* structure.

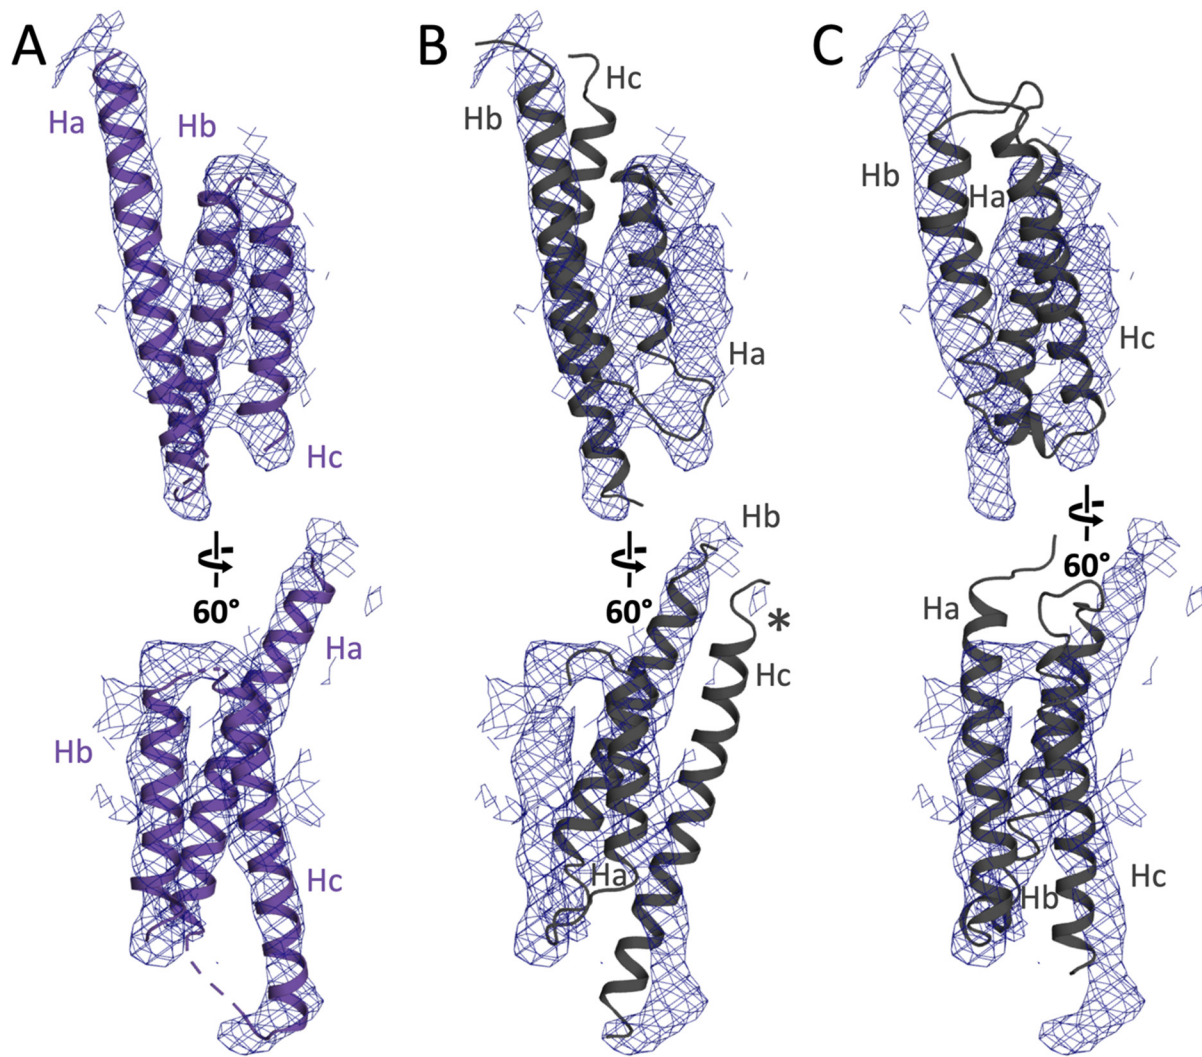

**Figure S7. Electron density for *K. lactis* Use1 is consistent with an Habc domain topology.** *A*, Contoured at  $1\sigma$ , the *K. lactis* 2Fo-Fc SNARE omit map (blue mesh) contains density for three  $\alpha$ -helices, here modeled based on the top scoring molecular replacement solution, *S. cerevisiae* Vti1 (3ONJ, gray). *B*, An alternative molecular replacement solution, obtained by using *E. gossypii* Sec20 as a search model, failed to occupy all three helical densities. The starred helix instead clashes with hairpins 1 and 3 of Sec39. *C*, A second alternative molecular replacement solution, obtained by using *S. cerevisiae* Vam3 (1HS7) as a search model, failed to recapitulate inter-helix connectivities present in the electron density map. See also Table S3.



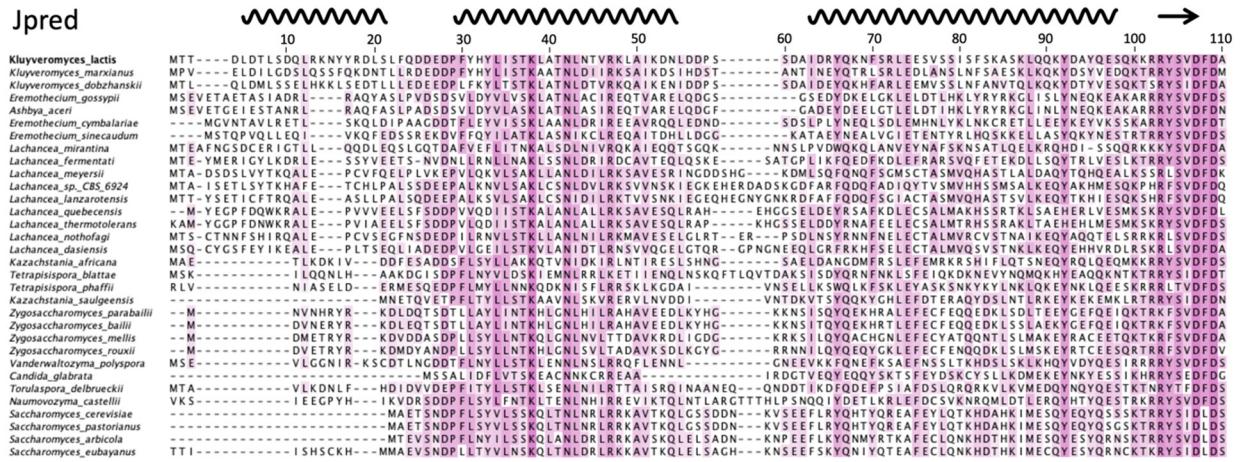

**Figure S8. Secondary structure prediction suggests that the N-terminal domain of Use1 is  $\alpha$ -helical.** Secondary structure prediction (61) identified three putative  $\alpha$ -helices in the N-terminal domain of *K. lactis* Use1. Because the first helix in the sequence is not conserved among some orthologues, including *S. cerevisiae*, it is possible that the long Ha helix observed in Use1 comprises the first two predicted helices. Sequence conservation is shown in purple.

**Table S1. Summary of crystallographic parameters.**

|                                                         | <i>E. gossypii</i><br>Tip20 <sub>A-E</sub> •Sec20 <sub>NTD</sub><br>(PDB 6WC3) | <i>K. lactis</i><br>Sec39•Use1 <sub>NTD</sub> •Dsl1 <sub>C-E</sub><br>(PDB 6WC4) |                                |
|---------------------------------------------------------|--------------------------------------------------------------------------------|----------------------------------------------------------------------------------|--------------------------------|
| <b>Data collection</b>                                  |                                                                                |                                                                                  |                                |
| Beamline                                                | NSLS-II AMX                                                                    | NSLS-II FMX                                                                      |                                |
| Wavelength (Å)                                          | 0.97930                                                                        | 0.97932                                                                          |                                |
| Space group                                             | P6 <sub>2</sub> 22                                                             | C121                                                                             |                                |
| Cell dimensions                                         |                                                                                |                                                                                  |                                |
| <i>a</i> , <i>b</i> , <i>c</i> (Å)                      | 133.3, 133.3, 288.5                                                            | 240.8, 87.9, 161.4                                                               |                                |
| <i>α</i> , <i>β</i> , <i>γ</i> (°)                      | 90.0, 90.0, 120.0                                                              | 90.0, 196.6, 90.0                                                                |                                |
| Resolution (Å) <sup>a</sup>                             |                                                                                | <b>Isotropic</b>                                                                 | <b>Anisotropic<sup>b</sup></b> |
|                                                         | 28.12-3.20                                                                     | 29.30-6.56                                                                       | 29.60-5.73                     |
|                                                         | (3.32-3.20)                                                                    | (6.79-6.56)                                                                      | (6.65-5.73)                    |
| Total reflections                                       | 665895                                                                         | 42694                                                                            | 47884                          |
| Unique reflections                                      | 25534                                                                          | 6268                                                                             | 7053                           |
| Completeness (%) <sup>a</sup>                           | 99.1 (93.5)                                                                    | 97.5 (90.3)                                                                      | 89.5 (55.5)                    |
| Multiplicity <sup>a</sup>                               | 26.1 (22.7)                                                                    | 6.8 (6.2)                                                                        | 6.8 (6.4)                      |
| <i>R</i> <sub>merge</sub> (%) <sup>a</sup>              | 13.1 (106)                                                                     | 9.8 (165)                                                                        | 11.5 (181)                     |
| <i>R</i> <sub>meas</sub> (%) <sup>a</sup>               | 13.4 (109)                                                                     | 10.6 (180)                                                                       | 13.5 (217)                     |
| <I/σ <sub>I</sub> > <sup>a</sup>                        | 27.6 (3.5)                                                                     | 11.4 (1.0)                                                                       | 10.7 (1.1)                     |
| CC <sub>1/2</sub> <sup>a</sup>                          | 1.000 (0.896)                                                                  | 0.998 (0.344)                                                                    | 0.997 (0.319)                  |
| <b>Refinement</b>                                       |                                                                                |                                                                                  |                                |
| Resolution (Å)                                          | 28.12-3.20                                                                     | 29.60-5.73                                                                       |                                |
| No. reflections                                         | 25522                                                                          | 7034                                                                             |                                |
| <i>R</i> <sub>work</sub> / <i>R</i> <sub>free</sub> (%) | 0.210/0.248                                                                    | 0.276/0.321                                                                      |                                |
| No. atoms                                               | 5482                                                                           | 6126                                                                             |                                |
| Protein                                                 | 5482                                                                           | 6126                                                                             |                                |
| Water                                                   | 0                                                                              | 0                                                                                |                                |
| Average B-factor (Å <sup>2</sup> )                      | 79.5                                                                           | 398                                                                              |                                |
| <b>RMSD</b>                                             |                                                                                |                                                                                  |                                |
| Bond lengths (Å)                                        | 0.005                                                                          | 0.009                                                                            |                                |
| Bond angles (°)                                         | 1.08                                                                           | 1.16                                                                             |                                |
| Clashscore                                              | 6.69                                                                           | 9.9                                                                              |                                |
| <b>Ramachandran</b>                                     |                                                                                |                                                                                  |                                |
| Favored                                                 | 95.8                                                                           | 95.1                                                                             |                                |
| Allowed                                                 | 4.2                                                                            | 4.4                                                                              |                                |
| Outliers (%)                                            | 0                                                                              | 0.5                                                                              |                                |

<sup>a</sup>Values in parentheses are for the highest resolution shell.

<sup>b</sup>An elliptical resolution cut-off was applied to the data using the STARANISO server. Values listed are first using a traditional spherical cut-off and second extended using an elliptical cut-off. STARANISO identified an isotropic cut-off resolution limit of 6.73 Å and an elliptical worst-diffraction limit of 7.15 Å.

**Table S2. Isothermal titration calorimetry fit parameters of *S. cerevisiae* Tip20 mutants.**

| Cell                                                            | Syringe                                                      | N                          | K <sub>D</sub><br>(nM)     | ΔH<br>(kcal/mol)        | ΔG<br>(kcal/mol) | -TΔS<br>(kcal/mol) |
|-----------------------------------------------------------------|--------------------------------------------------------------|----------------------------|----------------------------|-------------------------|------------------|--------------------|
| <i>E. gossypii</i><br>Tip20<br>(30 μM)                          | <i>E. gossypii</i><br>MBP-Sec20 <sub>1-136</sub><br>(420 μM) | 0.86<br>±0.01 <sup>a</sup> | 88 ± 20 <sup>a</sup>       | -9.1 ± 0.2 <sup>a</sup> | -9.6             | -0.51              |
| <i>S. cerevisiae</i><br>Tip20<br>(2.5 μM)                       | <i>S. cerevisiae</i><br>Sec20 <sub>1-174</sub><br>(25 μM)    | 0.90<br>±0.02 <sup>a</sup> | 110 ±<br>30 <sup>a</sup>   | -42 ± 2 <sup>a</sup>    | -9.5             | 32                 |
| <i>S. cerevisiae</i><br>Tip20 <sub>I481D</sub><br>(2.5 μM)      | <i>S. cerevisiae</i><br>Sec20 <sub>1-174</sub><br>(25 μM)    | 1.11<br>±0.05 <sup>a</sup> | 190 ±<br>60 <sup>a</sup>   | -33 ± 3 <sup>a</sup>    | -9.2             | 24                 |
| <i>S. cerevisiae</i><br>Tip20 <sub>L585D</sub><br>(10 μM)       | <i>S. cerevisiae</i><br>Sec20 <sub>1-174</sub><br>(150 μM)   | 1.16<br>±0.02 <sup>a</sup> | 400 ±<br>70 <sup>a</sup>   | -34 ± 1 <sup>a</sup>    | -8.7             | 26                 |
| <i>S. cerevisiae</i><br>Tip20 <sub>I481D/L585D</sub><br>(12 μM) | <i>S. cerevisiae</i><br>Sec20 <sub>1-174</sub><br>(150 μM)   | 0.78<br>±0.02 <sup>a</sup> | 1700 ±<br>400 <sup>a</sup> | -29 ± 2 <sup>a</sup>    | -7.9             | 21                 |

<sup>a</sup>Errors reported are fit errors.

**Table S3. Alternative Use1 Habc domain molecular replacement solutions.**

| <b>PDB code</b> | <b>Protein</b> | <b>Type</b> | <b>Species</b>       | <b>eLLG<sup>a</sup></b> | <b>Solution<sup>b</sup></b> |
|-----------------|----------------|-------------|----------------------|-------------------------|-----------------------------|
| 3ONJ            | Vti1           | Qb-SNARE    | <i>S. cerevisiae</i> | 637.7                   | A                           |
| 6WC3            | Sec20          | Qb-SNARE    | <i>E. gossypii</i>   | 634.3                   | B                           |
| 1VCS            | Vti1a          | Qb-SNARE    | <i>M. musculus</i>   | 631.4                   | B                           |
| 4J2C            | Stx6           | Qc-SNARE    | <i>H. sapiens</i>    | 630.1                   | B                           |
| 2C5K            | Tlg1           | Qc-SNARE    | <i>S. cerevisiae</i> | 624.1                   | B                           |
| 2V8S            | Vti1b          | Qb-SNARE    | <i>H. sapiens</i>    | 623.5                   | B                           |
| 1HS7            | Vam3           | Qa-SNARE    | <i>S. cerevisiae</i> | 619.9                   | C                           |
| 1FIO            | Sso1           | Qa-SNARE    | <i>S. cerevisiae</i> | 604.0                   | C                           |
| 1LVF            | Stx6           | Qc-SNARE    | <i>R. norvegicus</i> | 582.4                   | B                           |

<sup>a</sup>Final expected log likelihood gain calculated by Phaser, a metric to assess quality of molecular replacement solution that takes into account both resolution and predicted homology to search model.

<sup>b</sup>The solutions clustered into three types. An example of each solution type is depicted in Figure S7, in the corresponding panels A-C.
